**The neural basis of effort valuation:  
A meta-analysis of functional magnetic resonance imaging studies**

Paula Lopez-Gamundi<sup>a,b,1,\*</sup>, Yuan-Wei Yao<sup>c,d,e,1,\*</sup>, Trevor T-J. Chong<sup>f,2</sup>, Hauke R. Heekeren<sup>c,d,e,2</sup>, Ernest  
Mas Herrero<sup>b,2</sup>, Josep Marco Pallares<sup>a,b,2</sup>

<sup>a</sup> Department of Cognition, Development and Educational Psychology, Institute of Neurosciences,  
University of Barcelona, Spain; Passeig de la Vall d'Hebron, 171, 08035 Barcelona

<sup>b</sup> Cognition and Brain Plasticity Unit, Bellvitge Biomedical Research Institute, Spain; Hospital Duran i  
Reynals, 3a planta / Gran Via de l'Hospitalet, 199, 08908 Hospitalet de Llobregat

<sup>c</sup> Department of Education and Psychology, Freie Universität Berlin, Berlin, 14159, Germany

<sup>d</sup> Einstein Center for Neurosciences Berlin, Charité-Universitätsmedizin Berlin, 10117, Germany

<sup>e</sup> Berlin School of Mind and Brain, Humboldt-Universität zu Berlin, Berlin, 10117, Germany

<sup>f</sup> Turner Institute for Brain and Mental Health, Monash University, Victoria, 3800, Australia

\* Corresponding Author: Paula Lopez-Gamundi ([plopezgamundi@ub.edu](mailto:plopezgamundi@ub.edu)) or Yuan-Wei Yao  
([yywyao@gmail.com](mailto:yywyao@gmail.com))

1 Equal contribution

2 Equal contribution

## Abstract

Choosing how much effort to expend is a critical for everyday decisions. While effort-based decision-making is altered in common psychopathologies and many neuroimaging studies have been conducted to examine how effort is valued, it remains unclear where the brain processes effort-related costs and integrates them with rewards. Using meta-analyses of combined maps and coordinates of functional magnetic resonance imaging (fMRI) studies (total N = 22), we showed that raw effort demands consistently activated the pre-supplementary motor area (pre-SMA). In contrast, the net value of effortful reward consistently activated regions, such as the ventromedial prefrontal cortex (vmPFC) and ventral striatum (VS), that have been previously implicated in value integration in other cost domains. The opposite activation patterns of the pre-SMA and vmPFC imply a double dissociation of these two regions, in which the pre-SMA is involved in pure effort cost representation and the vmPFC in net value integration. These findings advance our understanding of the neural basis of effort-related valuation and reveal potential brain targets to treat motivation-related disorders.

Key words: Effort; subjective value; effort based decision making; value integration; fMRI; ventromedial prefrontal cortex; supplementary motor area, meta-analysis

## 1 1. Introduction

2           Every day, we are faced with choices about whether to invest effort to attain certain goals  
3 (Bailey et al., 2016; Salamone et al., 2009). These effort demands are often regarded as costly, such that  
4 individuals tend to avoid one action if it requires too much effort (Kool et al., 2010; Kurniawan et al.,  
5 2010, 2011). The ability to accurately weigh energy requirements against potential benefits (e.g.,  
6 “effort-based decision-making”), is therefore crucial for optimal goal-directed action, and alterations in  
7 this function are believed to be a core component of motivational disorders, such as apathy (Chong and  
8 Husain, 2016; Hartmann et al., 2015; Husain and Roiser, 2018), and have been found across a variety of  
9 psychopathologies, including depression (Treadway et al., 2012; Yang et al., 2014), schizophrenia (Barch  
10 et al., 2014; Park et al., 2017), Parkinson’s disease (Chong, 2018; den Brok et al., 2015; Le Heron et al.,  
11 2018), and substance dependence (Grodin et al., 2016). Due to its clear clinical importance, there has  
12 been a recent surge of interest in how effort devalues prospective rewards, and such studies have  
13 demonstrated that effort might be a unique cost, distinct from other more investigated cost domains,  
14 such as risk and delay. However, work on the neural mechanisms underlying effort-based valuation have  
15 yielded heterogeneous results, and the question of how humans integrate effort and reward remains a  
16 subject of contention.

17           Most behavioral economic theories of reward-related behavior rely on the assumption that an  
18 organism weighs a reward and its associated costs to generate a net value of an option (Kahneman and  
19 Tversky, 1979; Sutton and Barto, 1998; Von Neumann and Morgenstern, 1990). A popular hypothesis  
20 proposes that, to effectively compare different options, the net value of each must be represented in a  
21 ‘common currency’ (Padoa-Schioppa, 2011; Rangel et al., 2008; Westbrook and Braver, 2015). A  
22 network of regions, including the ventromedial prefrontal cortex (vmPFC; and adjacent orbitofrontal  
23 cortex) and ventral striatum (VS), have been repeatedly implicated in the encoding of the net value of  
24 rewards discounted by the costs associated with obtaining them (Bartra et al., 2013; Levy and Glimcher,  
25 2012). Based on these data, this valuation network is posited to be ‘domain-general’, as it tracks net  
26 value representations regardless of the nature of the reward (e.g., primary vs secondary) (Bartra et al.,  
27 2013; Sescousse et al., 2013) or of the type of cost (e.g., risk vs delay) (Kable and Glimcher, 2007; Peters  
28 and Büchel, 2009; Prévost et al., 2010).

29           However, much of these data have focused on outcome-related costs such as risk or delay.  
30 Notably, research on effort-based valuation suggests a limited role for the vmPFC and VS for value  
31 integration. Instead, other frontal regions beyond this core valuation network, including the anterior

32 cingulate cortex (ACC), supplementary motor area (SMA), and anterior insula (AI), have been shown to  
33 signal net value discounted by effort costs (Arulpragasam et al., 2018; Camille et al., 2011; Chong et al.,  
34 2017; Klein-Flugge et al., 2016; Massar et al., 2015; Skvortsova et al., 2014; Walton et al., 2003). These  
35 findings are consistent with animal studies showing that lesions to the ACC, but not the nucleus  
36 accumbens, prelimbic/infralimbic cortex (homologous to the vmPFC), or orbitofrontal cortex, reduce the  
37 amount of effort rats invested for rewards (Rudebeck et al., 2006; Walton et al., 2009, 2003).  
38 Furthermore, neural activity in the ACC, as measured by single unit recordings, varies with cost-benefit  
39 weighting (Hillman and Bilkey, 2012, 2010) and effort-related choice (Cowen et al., 2012). This body of  
40 work thus raises the possibility that a distinct frontal network is specifically recruited to integrate effort-  
41 related value.

42 On the other hand, these frontal regions (i.e. ACC, pre-SMA, AI, etc.) are also commonly  
43 implicated in cognitive control processes (Wu et al., 2020), which may overlap or obscure value signals.  
44 For example, value-based decision-making may trigger cognitive control functions such as conflict  
45 detection and response inhibition (Botvinick and Braver, 2015; Botvinick et al., 2001), surprise and/or  
46 prediction error signaling (Vassena et al., 2020, 2017), and invigoration of goal-directed behavior  
47 (Kouneiher et al., 2009; Kurniawan et al., 2013; Mulert et al., 2005). Therefore, it is plausible that these  
48 regions are recruited to prepare and invigorate behaviors necessary for realizing a prospective reward  
49 instead of for computing prepotent net values per se. Another situation that requires cognitive control is  
50 difficult decision-making when two simultaneously presented options have similar net value (Chong et  
51 al., 2017; Hunt et al., 2012; Klein-Flugge et al., 2016; Massar et al., 2015; Shenhav et al., 2013). Indeed,  
52 studies that have independently manipulated net value and decision difficulty showed that these frontal  
53 regions, particularly the dorsal ACC, specifically tracked decision difficulty (Hogan et al., 2017;  
54 Westbrook et al., 2019) while, in contrast, the vmPFC uniquely tracked net value (Westbrook et al.,  
55 2019). Taken together, these findings suggest that this distinct frontal network is recruited more  
56 specifically for cognitive control, such as response planning and option comparison, and that effort-  
57 related value integration is still processed in the core valuation network (e.g., vmPFC and VS) that have  
58 been identified in other cost domains.

59 The inconsistencies in previous studies may be related to several issues. For example, some may  
60 have been statistically underpowered due to small sample sizes, which may have reduced the  
61 probability of detecting significant effects, and/or reduce the reliability of their findings (Müller et al.,  
62 2018; Poldrack et al., 2017). Furthermore, the specific effort requirements of each task may have

63 induced different patterns of brain activity, making it difficult to judge whether findings from individual  
64 studies can be generalized to the cognitive process of interest. A promising approach to address these  
65 issues is to quantitatively synthesize fMRI data across multiple studies using an image-based meta-  
66 analysis (Muller et al., 2018). Relative to traditional meta-analyses based only on peak coordinates of  
67 significant activity, an image-based meta-analytic approach uses the full information of the statistical  
68 maps from each study, and has greater power to detect small effect sizes (Luijten et al., 2017; Salimi-  
69 Khorshidi et al., 2009). A previous study showed that even the inclusion of 20% of statistical maps for  
70 included studies could significantly improve the precision of a meta-analysis (Radua et al., 2012).

71 Here, we conducted a hybrid coordinate- and image-based fMRI meta-analysis to identify the  
72 neural correlates of effort-related cost processing and value integration. Considering their critical roles  
73 in response planning, we hypothesized that frontal regions like the ACC, SMA, and AI would be  
74 consistently involved in representing prospective effort, independent of the reward offer. We also  
75 aimed to test whether effort-related value integration (i.e., the integration of reward value with the  
76 effort required to obtain it) relied on the core valuation areas such as the vmPFC and VS or broader  
77 frontal regions.

78

## 79 **2. Materials and Methods**

### 80 2.1. Literature Screen, Data Collection, and Preparation

#### 81 *2.1.1 Exhaustive Literature Search.*

82 We conducted a systematic literature search to identify neuroimaging studies on prospective  
83 effort and the integration of reward value and effort costs in healthy adults. Candidates for inclusion  
84 were initially identified by searching PubMed, ProQuest, and Web of Science on June 29, 2020 using the  
85 grouped terms (“fMRI” OR “functional magnetic resonance imaging”) AND (“effort discounting” OR  
86 “effort-based decision-making” OR “effort valuation” OR “effort anticipation” OR “cost-benefit  
87 valuation” OR “cognitive effort” OR “physical effort” OR “effort expenditure” OR “effort allocation” OR  
88 “effortful goal directed action” OR “reward related motivation” OR “reward related effort”). Searches  
89 were limited to human studies where databases would allow. 121, 787, and 127 studies were identified  
90 on PubMed, ProQuest, and Web of Science, respectively. We also searched existing in-house reference  
91 libraries and names of prominent authors in the field, resulting in the addition of candidate studies. 934  
92 candidate studies remained after search results were pooled and duplicates removed. Two researchers

93 (PL-G, Y-WY) then independently reviewed the title and abstract of candidate papers to determine  
94 relevance, resulting in a pool of 72 studies that underwent a full-text review (Figure 1).

95

#### 96 *2.1.2 Inclusion/Exclusion Criteria.*

97 Studies were included if they: 1) had a healthy adult human sample in the non-elderly age range  
98 (ages 18 to 65, with one exception detailed below); 2) used functional MRI; 3) either reported or  
99 referenced a whole-brain analysis; and 4) utilized a task with an effort component with clear effort (or  
100 combined effort and reward) cues during an ‘anticipation’ phase. Please note that ‘anticipation’ in this  
101 case refers to the evaluation of prospective effortful rewards before or during decision-making, and  
102 does not include anticipatory responses to reward post-effort exertion (e.g., the ‘evaluation’ phase  
103 described in Assadi et al., (2009)).

104 To ensure that the selected studies could be meaningfully compared, we limited the final corpus  
105 to those that used experimental paradigms with certain characteristics. First, because studies have  
106 found that loss and gain are asymmetric and partially dissociable (Chen et al., 2020; Porat et al., 2014;  
107 Tanaka et al., 2014), we excluded studies that used paradigms with only loss conditions, or that only  
108 conducted gain vs loss comparisons. Second, we excluded studies that only used a single speeded  
109 response as its effort component (e.g. classical Monetary Incentive Delay task (Knutson et al., 2000)), as  
110 this was not deemed as a significant effort demand, and other reviews and meta-analyses focusing on  
111 reward anticipation with these paradigms can be found elsewhere (Diekhof et al., 2012; Knutson and  
112 Greer, 2008; Wilson et al., 2018). Finally, we only included those studies which measured activity during  
113 the *prospective* valuation of an action and its rewards, rather than only at the time of reward outcome,  
114 as estimates of previously expended effort can be biased by reward receipt (Pooresmaeili et al., 2015).

115 We contacted the corresponding authors of 28 candidate studies to request whole-brain  
116 statistical maps for the analyses of interest, and received whole-brain statistical maps or peak  
117 coordinates from 25 studies. In cases where only between-group (e.g. clinical studies) and/or ROI results  
118 were reported, we contacted corresponding authors to inquire about the availability of whole-brain  
119 results for relevant contrasts in healthy adult subjects. If images were not available, we requested they  
120 provide us with peak activation foci in stereotactic spatial coordinates (i.e., Talairach or MNI space),  
121 together with the direction of the effect (positive or negative).

122

123 *2.1.3 Data collection and preparation.*

124 We performed two analyses of interest. The first examined activity related to the raw effort  
125 involved in the option itself. We included analyses that examined high vs. low effort demands (i.e.,  
126 categorical contrasts) and those that examined continuous changes in effort (i.e., parametric  
127 modulation). The second analysis examined activity related to the prospective net value of an effortful  
128 reward. Whenever possible, we used the contrast related to the net value of a single option (i.e., the  
129 subjective value of the chosen option discounted by the effort required to obtain it). When this contrast  
130 was unavailable, we used the contrast related to the differences between options instead. Studies that  
131 only investigated BOLD activity associated with interactions between reward and effort were excluded,  
132 as they did not rely on the same discounting assumptions as other measures of net value. It should be  
133 noted that one study (Nagase et al., 2018) included two experiments with six common participants, so  
134 we selected the experiment with a larger sample size for the meta-analysis. In another study (Chong et  
135 al., 2017), all participants took part in both cognitive and physical effort-based decision-making tasks.  
136 Thus, we combined the statistical maps from both tasks to avoid selection bias. Finally, one study  
137 (Seaman et al., 2018) had a sample that included participants ranging from 22 to 83 years old. However,  
138 the authors of this study provided whole-brain maps that controlled for the effect of age, and we chose  
139 to include this data in the net value meta-analysis.

140

141 *2.1.4 Final Corpus.*

142 As shown in Figure 1, 25 studies were ultimately included in the final corpus of studies, which  
143 were considered in one or both meta-analyses on raw effort evaluation and effort-reward integration.  
144 The raw effort valuation analysis included 15 maps (65%) and 7 coordinates for raw effort processing,  
145 resulting in 22 studies with a total sample of N = 549 (mean = 24.95; median = 22.5, range = [16-50]). A  
146 description of the final corpus of studies can be found in Table 1. The value integration analysis included  
147 11 maps (73%) and 4 coordinates, resulting in 15 studies, with a total sample of N = 428 participants  
148 (mean = 28.5; median = 23, range = [16-75]).

149

150 *2.2 Meta-Analytic Procedures*

151 *2.2.1 Seed-based d Mapping.*

152           The combined image- and coordinate-based meta-analyses were performed using the software  
153 Seed-based  $d$  Mapping with Permutation of Subject Images (SDM-PSI, version 6.21;  
154 <https://www.sdmproject.com>). SDM-PSI preserves the information about the sign of the effect and the  
155 methods have been validated in previous studies (Albajes-Eizagirre et al., 2019; Radua et al., 2012).  
156 During preprocessing, SDM-PSI recreated voxel-level maps of standardized effect sizes (i.e., Hedge's  $g$ )  
157 and their variances and allowed the incorporation of both whole-brain  $t$ -maps and peak information  
158 (i.e., coordinates and  $t$ -values). The inclusion of statistical maps can substantially increase the sensitivity  
159 of meta-analyses compared with the pure coordinate-based approach (Radua et al., 2012). When  $t$ -  
160 maps were unavailable, SDM-PSI estimated them based on coordinates and their effect sizes using  
161 anisotropic kernels (Radua et al., 2014).

162

### 163 *2.2.2 Meta-analysis.*

164           Two separate whole-brain meta-analyses were conducted to examine consistent neural  
165 correlates of prospective effort and net value processing, respectively. Random-effect models were used  
166 to assess the mean effect size of each study, where the weight of a study is the inverse of the sum of its  
167 variance and the between-study variance. SDM  $z$ -maps were generated by dividing the voxel-wise effect  
168 sizes by their standard errors. As these  $z$ -values may deviate from a normal distribution, a null-  
169 distribution was estimated for each meta-analysis from 50 whole-brain permutations.

170

#### 171 *2.2.2.1 Region-of-Interest (ROI) Analysis.*

172           To directly investigate the involvement of key brain regions in effort-related cost processing and  
173 value integration, we focused on seven *a priori* regions of interest (ROIs) derived from an independent  
174 meta-analysis (Bartra et al., 2013) that examined valuation network in general. Those ROIs included: the  
175 vmPFC, right and left VS, ACC, pre-SMA, and right and left AI, which generally covered the core valuation  
176 network and additional frontal regions of interest. A spherical mask of radius 6mm was created for each  
177 ROI centered on the respective peak coordinates. Mean effect sizes and variances of those ROIs were  
178 extracted from individual studies with statistical maps.

179

#### 180 *2.2.2.2 Whole-Brain Analysis.*



181 We also examined the whole-brain results beyond these *a priori* ROIs. To reduce the false-  
182 positive results due to multiple comparisons, we applied a familywise error (FWE) correction with 1000  
183 subject-based permutations (Albajes-Eizagirre et al., 2019). In accordance with SDM-PSI's  
184 recommendations, a threshold-free cluster enhancement (TFCE) corrected  $p < 0.025$  was used (Albajes-  
185 Eizagirre et al., 2019).

186 In addition, we performed a conjunction analysis to identify regions that were associated with  
187 both raw effort demand and net value. For exploratory purposes, we created maps using a voxel-level  
188 uncorrected threshold of  $p < 0.001$  and a cluster size  $> 20$  voxels for both meta-analyses. Masks were  
189 generated from significant clusters that activated or deactivated in both processes (i.e., based on  
190 absolute values). We then used SPM12 (<http://www.fil.ion.ucl.ac.uk/spm>) to perform a conjunction  
191 analysis to extract overlapping areas for both processes, regardless of the direction (Culter & Campbell-  
192 Meiklejohn, 2019).

193 Finally, we conducted two supplementary analyses. First, because of the possible role of the  
194 dorsal ACC and other frontal regions in signaling choice difficulty, we were interested in assessing if our  
195 findings were influenced by studies that used net value differences as the parameter, rather than the  
196 net value of the chosen option. Thus, we repeated the meta-analysis with a subgroup of studies that  
197 used parameters only representing the net value of a single option (N=11). Second, because net value  
198 can also be more broadly defined as an interaction between reward and effort, we repeated the net  
199 value meta-analysis by including the coordinates of two additional studies (Kurniawan et al., 2010;  
200 Stoppel et al., 2011) that used interaction parameters (e.g. Reward X Effort) as opposed to traditional  
201 discounting parameters of net value (e.g. SV). These analyses were conducted using the same  
202 procedures described above.

203

### 204 *2.2.3 Heterogeneity and Publication Bias.*

205 Areas of significant activation were assessed for heterogeneity and publication bias. For each  
206 meta-analysis, peaks with heterogeneity  $I^2$  values  $> 20\%$  were flagged and inspected. In order to assess  
207 publication bias, Hedge's  $g$  effect size estimates were extracted at the study level for peak voxels of  
208 significant clusters. Funnel plots were created and visually inspected. Egger regression tests (Egger et al.,  
209 1997) were conducted to quantitatively test the asymmetry of each funnel plot.

210

211 2.3 Data Availability.

212 Unthresholded z-maps of our results are available at NeuroVault:

213 <https://neurovault.org/collections/9286/>. The TFCE-corrected maps as well as publication bias and  
214 heterogeneity data are available from the corresponding authors upon request.

215

216 **3. Results**

217

218 3.1. ROI Analysis

219 To directly examine the roles of key regions in raw effort prospect and effort-reward integration,  
220 we focused on seven *a priori* ROIs. Results are summarized in Table 2. The vmPFC showed consistent  
221 activations related to net value and deactivations related to prospective effort. The bilateral VS showed  
222 a similar activity pattern, but smaller effect sizes for both analyses. In contrast, the pre-SMA showed  
223 consistent activations related to effort demand and deactivations related to net value. The ACC and  
224 bilateral AI showed similar activity pattern, but smaller effect sizes for both analyses. Figures 2 and 3  
225 show the Hedge's *g* effect sizes for raw effort prospect and net value analyses in the vmPFC and pre-  
226 SMA ROIs. The forest plots for other regions were shown in Figure S1-S10.

227

228 3.2. Whole-Brain Analysis

229 3.2.1 *Prospective Effort*

230 We first examined brain regions that were consistently associated with the valuation of  
231 prospective effort demands. As illustrated in Figure 4a, the analysis yielded positive effects clustered in  
232 the right pre-SMA and adjacent caudal ACC (see Table 3). At a more lenient, uncorrected  $p < 0.001$   
233 threshold, other positive foci were detected in the left SMA, right precuneus, and left middle frontal  
234 gyrus, and negative foci were detected in the bilateral vmPFC/OFC and left middle temporal gyrus.

235 Heterogeneity  $I^2$  statistics, funnel plots and Egger regressions did not detect excess  
236 heterogeneity or publication bias in any significant clusters in the TFCE-corrected findings. However, in  
237 the uncorrected analysis, activation in a cluster in the right precuneus was found to be associated with  
238 extreme heterogeneity ( $I^2=59.50\%$ ).

239

### 240 3.2.2. Net Value.

241 Next, we examined brain regions that were consistently associated with net value encoding. As  
242 illustrated in Figure 4b, the analysis yielded a large cluster connecting cortical and subcortical regions of  
243 the medial PFC, VS, dorsal striatum (bilateral putamen and left caudate), and temporal gyrus (see Table  
244 3). Analysis also yielded consistent net value activations in a cluster consisting of the bilateral medial and  
245 posterior cingulate cortex and precuneus and a separate cluster in the left middle frontal gyrus.  
246 Deactivations were concentrated in small clusters in the left SMA, right dorsolateral PFC (dlPFC), and  
247 right superior frontal gyrus, although these deactivations were only detectable at a lenient uncorrected  
248  $p < 0.001$  threshold.

249 In addition, heterogeneity  $I^2$  statistics, funnel plots and Egger regressions showed no evidence of  
250 excess heterogeneity or publication bias in any of the significant clusters for the main net value or single  
251 SV subgroup TFCE-corrected results. No evidence of publication bias was detected in the uncorrected  
252 net value analysis, however deactivations in the left SMA and right dlPFC had  $I^2$  statistics of 64.09% and  
253 50.05% respectively, suggesting that findings in these two regions were highly heterogenous.

254

### 255 3.2.3 Conjunction Analysis

256 Finally, we performed a conjunction analysis to identify areas that are sensitive to *both* net  
257 value and effort requirements. Due to the exploratory nature of this analysis, we used a lenient  
258 threshold of uncorrected  $p < 0.001$  at voxel level and  $k > 20$  at cluster level. Note that we used absolute  
259 values in the conjunction analysis because of the clearly dissociable effects found in the main  
260 prospective effort and net value meta-analyses. We found that the vmPFC and left lateral orbitofrontal  
261 cortex were significantly activated by net value but deactivated by effort requirement. The activation  
262 pattern was reversed in the pre-SMA and caudal ACC (Figure 4c). However, all of these findings were not  
263 detectable after whole-brain TFCE-correction.

264

### 265 3.2.4 Supplementary analyses

266 To ensure that the results of the net value meta-analysis were not driven by choice difficulty, we  
267 reran our analysis excluding four experiments that used the value of two options as their net value  
268 metric (e.g. difference in SV of more vs less effortful option). Importantly, the vmPFC and bilateral VS  
269 remained to be the foci with highest effect sizes, and the whole-brain activation pattern was  
270 qualitatively similar (see Table S1 and Figure S11), suggesting that our main findings were not influenced  
271 by the cognitive demands of comparing two options. Moreover, to ensure that our findings were robust  
272 when using a broader definition of net value, we also repeated our analysis including two additional  
273 studies that used reward and effort interactions as a measure of net value. Main foci and whole-brain  
274 activation patterns remained qualitatively similar to the initial net value meta-analysis (see Table S2 and  
275 Figure S12). However, deactivations associated with net value were not detected in these  
276 supplementary analyses, suggesting that the deactivations in the SMA detected in the main meta-  
277 analysis were not robust.

278

#### 279 **4. Discussion**

280 We conducted a series of combined coordinate- and image-based meta-analyses to examine the  
281 neural substrates of effort-based valuation. We first investigated neural activity related to raw effort  
282 and net value in seven *a priori* ROIs previously implicated in value-based decision-making. We found  
283 these regions could be broadly divided into two groups that exhibited distinct activity pattern during  
284 these two processes, with the vmPFC and pre-SMA as the central node of each. Specifically, the vmPFC  
285 was consistently activated during net value integration but deactivated for raw effort representation,  
286 whereas the pre-SMA displayed the opposite pattern. The exploratory whole-brain and conjunction  
287 analyses further corroborate the ROI analyses. These findings provide strong evidence for a dissociable  
288 role of the vmPFC and pre-SMA in the valuation of effort costs, and implicate these two regions as core  
289 components of a network that drives motivated behavior.

290 Our findings provide comprehensive evidence that effort-related net value integration is  
291 processed in a network centered around the vmPFC and VS. Accumulating evidence implicates the  
292 vmPFC as a general hub for value integration, as it has been identified to signal net value of rewards  
293 across different cost domains, such as risk and delay (Croxson et al., 2009; Hogan et al., 2019; Kable and  
294 Glimcher, 2007; Levy et al., 2010; Peters and Büchel, 2009; Schmidt et al., 2012; Westbrook et al., 2019).  
295 Additionally, the network including the vmPFC have been implicated in tracking net values across reward  
296 domains (i.e., primary, secondary, and aesthetic rewards), reward processing phases (Bartra et al., 2013;

297 Clithero and Rangel, 2013; Levy and Glimcher, 2012; Sescousse et al., 2013), reward rates, and the value  
298 of current and previous offers (Mehta et al., 2019). These findings are therefore consistent with  
299 prominent neuroeconomic accounts which propose that the vmPFC represent the net value of an option  
300 in a ‘common currency’, in order to facilitate value comparison during decision-making (Padoa-Schioppa,  
301 2011; Rangel et al., 2008; Westbrook and Braver, 2015).

302 One would hypothesize that a region involved in representing net value would also scale with  
303 effort demands. Except for the vmPFC, our study did not find that other net-value-related regions, such  
304 as the VS, meet this requirement. These findings are at odds with previous reports that the VS signals  
305 prospective effort costs in humans, both in the presence (Westbrook et al., 2019) and absence (Suzuki et  
306 al., 2020) of reward information. Moreover, dorsal parts of the striatum have also been found to track  
307 both effort costs (Burke et al., 2013; Guitart-Masip et al., 2012; Klein-Flugge et al., 2016; Kurniawan et  
308 al., 2010, 2013; Yang et al., 2016) and net value of prospective effortful rewards (Klein-Flugge et al.,  
309 2016; Seaman et al., 2018). However, our results implicate motor-related regions of the striatum,  
310 particularly the putamen, as signaling net value alone. One plausible explanation is that the striatum  
311 signals both net value and prospective effort during this time window, but that the simultaneous nature  
312 of these signals inhibits detection. Studies that have experimentally isolated prospective effort demands  
313 from net value, however, did not find that the striatum was activated by effort alone (Arulpragasam et  
314 al., 2018), leaving role of the striatum in effort anticipation as a salient question for future investigation.

315 Finally, both main and supplementary analyses consistently identified a variety of  
316 parietotemporal regions as scaling positively and uniquely with net value representations. While these  
317 regions (i.e. intraparietal lobule, intraparietal sulcus, temporal pole, etc.) have been previously  
318 implicated in SV encoding of effortful rewards (Chong et al., 2017; Massar et al., 2015), they also play a  
319 critical role in perceptual decision-making (Keuken et al., 2014), attention (Husain, 2019), risk weighting  
320 (Mohr et al., 2010), and decision difficulty (Westbrook et al., 2019). Their notable absence in reward  
321 processing (Keuken et al., 2014; Sescousse et al., 2013) may thus suggest that these parietotemporal  
322 regions are involved in high-level perceptual and cognitive functions associated with task demands as  
323 opposed to net value computation.

324 Previous studies have identified effort-related net value signals in other frontal regions, such as  
325 the pre-SMA and ACC, which suggests that these regions may be specifically relevant for effort-reward  
326 integration. In the current meta-analysis, however, we found that these regions – in particular, the pre-  
327 SMA and adjacent caudal ACC – all scaled positively with raw effort costs and, albeit less robustly, scaled  
328 negatively with net value. Such a pattern suggests that these regions are more likely to be involved in

329 the processing of effort-related costs, rather than value integration per se. These findings align closely  
330 with a previous transcranial magnetic stimulation study, in which disruption of the SMA led to decreased  
331 effort perception (Zénon et al., 2015). The pre-SMA and dorsal ACC are also recruited to process other  
332 types of costs, such as risk (Mohr et al., 2010) and delay (Schüller et al., 2019). A plausible mechanism,  
333 therefore, is that these regions serve as a domain-general hub for cost encoding and transfer the cost  
334 information to the vmPFC for calculation of net value. Alternatively, neuroeconomic models of effort-  
335 based decision-making have posited that the ACC, in particular, is involved in good-to-action  
336 transformation (Padoa-Schioppa, 2011). Thus, another plausible mechanism is that the vmPFC computes  
337 and compares the net value of separate options and passes choice preference to action selection  
338 regions, such as the pre-SMA and ACC, for conversion to motor output.

339         Despite strong evidence about the involvement of the caudal ACC, which is close to the pre-  
340 SMA, in effort costs processing, it should be noted that the ACC, as a whole, is highly heterogeneous  
341 (Neubert et al., 2015; Yu et al., 2011). Indeed, the whole-brain results showed distinct activation  
342 patterns across the ACC, in which net-value-related activation was mainly observed in the ventral ACC,  
343 whereas cost-related activation in the dorsal ACC. These findings suggest that subregions of the ACC  
344 could be linked to different aspects of the effort-related valuation, which may also partly explain the fact  
345 that some studies identified net value signals in the ACC (Klein-Flugge et al., 2016; Massar et al., 2015).  
346 Moreover, net-value-related activation may emerge in the dorsal ACC if it is highly correlated with other  
347 confounding variables, such as decision difficulty (Shenhav et al., 2013). It is particularly plausible for  
348 studies that have used the SV difference between two options as the net value parameter, as it often  
349 approximates decision difficulty (Chong et al., 2017; Klein-Flugge et al., 2016). Notably, studies that have  
350 experimentally isolated net value and decision difficulty showed that the cognitive control network,  
351 including the dorsal ACC and other frontoparietal regions, tracked the latter but not the former (Hogan  
352 et al., 2019; Westbrook et al., 2019).

353         The current study has some limitations. First, the sample size of the net value analysis is  
354 relatively small. Although the inclusion of statistical images partly offsets this issue, the number of  
355 included studies still limited our ability to further explore the effects of potential moderators, such as  
356 effort type (i.e., physical vs. cognitive), parameter type (i.e., difference in SV vs. SV of one option), effort  
357 execution requirement (i.e., real vs. hypothetical), and reward probability (i.e., cumulative vs. random  
358 payout). Because effort-based decision-making is sensitive to reward probability (Barch et al., 2014;  
359 Soder et al., 2020; Treadway et al., 2012) and opportunity costs (Otto and Daw, 2019), future research  
360 should directly explore the interaction between effort demand and other cost domains and/or task

361 features. Second, the majority of the included studies focused on physical effort measured by handgrip  
362 devices. These findings should be treated cautiously when generalizing to other formats of effort.  
363 Finally, the meta-analytic results reflected consistent regional activations across studies. Although our  
364 study identified critical brain regions related to effort-related value integration or cost encoding, how  
365 these regions interact with each other to achieve the dynamic valuation process remains to be  
366 elucidated by studies using task-based connectivity technique (Hauser et al., 2017) or imaging methods  
367 with higher temporal resolution (e.g., magnetoencephalography).

368 In conclusion, this study is the first to use combined image- and coordinate-based meta-analyses  
369 to examine neural activity related to effort-related costs and net value. The results showed the pre-SMA  
370 is involved in cost representation of prospective effort independent of rewards. In contrast, the vmPFC  
371 and VS, which have been implicated in value integration in other cost domains, are also involved in  
372 effort-reward integration. These findings further clarify the neural mechanisms underlying effort-related  
373 valuation and may provide candidate intervention targets for patients with decreased motivation to  
374 exert effort to obtain rewards.

375

376 **Acknowledgement**

377 PL-G was supported by a fellowship from “la Caixa” Foundation (LCF/BQ/DI19/11730047). Y-WY was  
378 supported by the PhD fellowship of the Einstein Center for Neurosciences Berlin. TT-JC was supported by  
379 the Australian Research Council (DP 180102383 and DE 180100389). The authors would like to thank  
380 Nadav Aridan, Amanda Arulpragasam, Javier Bernacer, Michael Chee, Vikram Chib, Claudie Gaillard,  
381 Erica Grodin, Tobias Hauser, Masud Husain, Miriam Klein-Flügge, Irma Kurniawan, Stijn Massar, Il Ho  
382 Park, Mathias Pessiglione, Ceyda Sayali, Jacqueline Scholl, Kendra Seaman, Vasilisa Skvortsova, Michael  
383 Treadway, and Andrew Westbrook for sharing whole-brain statistical maps or peak coordinates.

384

385 **Declarations of interest:**

386 None

387



388 Table 1. Summary of Included Studies

| Study             | N  | Task Type              | Effort Type (Description)              | Analysis    | Data Type   | Parameter                                       |
|-------------------|----|------------------------|----------------------------------------|-------------|-------------|-------------------------------------------------|
| Aridan 2019       | 40 | Choice                 | Physical (Handgrip)                    | Net Value   | Map         | P(yes)                                          |
|                   |    |                        |                                        | Effort      | Map         | Parametric effort demand                        |
| Arulpragasam 2018 | 28 | Choice                 | Physical (Key press)                   | Net Value   | Map         | SV of Chosen Option                             |
|                   |    |                        |                                        | Effort      | Map         | Effort demand of the variable option (at Cue 1) |
| Bernacer 2019     | 24 | Choice                 | Physical (Running)                     | Net Value   | Map         | SV Difference                                   |
|                   |    |                        |                                        | Effort      | Map         | Max > no effort                                 |
| Bonnelle 2016     | 37 | Choice                 | Physical (Handgrip)                    | Net Value   | Coordinates | “Expected Reward”                               |
| Chong 2017*       | 34 | Choice                 | Physical (Handgrip) + Cognitive (RSVP) | Net Value   | Map         | SV Difference                                   |
|                   |    |                        |                                        | Effort      | Map         | Parametric effort demand                        |
| Croxson 2009      | 16 | No choice              | Physical (Trackball)                   | Net Value   | Coordinates | Log (reward/effort)                             |
|                   |    |                        |                                        | Effort      | Coordinates | Increasing effort level                         |
| Hogan 2019        | 34 | Choice                 | Physical (Handgrip)                    | Net Value   | Map         | SV of chosen option                             |
| Gaillard 2019     | 23 | No Choice              | Cognitive (Spatial WM)                 | Effort      | Map         | Categorical High vs Low WM Load                 |
| Grodin 2016       | 17 | No Choice              | Physical (Key press)                   | Effort      | Map         | Categorical High vs Low effort                  |
| Hauser 2017       | 28 | Reward/effort learning | Physical (Handgrip)                    | Effort      | Map         | Parametric expected effort demand               |
| Klein-Flügge 2016 | 21 | Choice                 | Physical (Handgrip)                    | Net Value   | Map         | SV difference                                   |
|                   |    |                        |                                        | Effort      | Map         | Parametric Effort Difference                    |
| Kurniawan 2010    | 17 | Choice                 | Physical (Handgrip)                    | Net Value** | Coordinates | Reward X [choice to grip > choice to hold]      |
|                   |    |                        |                                        | Effort      | Coordinates | High > low effort of chosen option              |
| Kurniawan 2013    | 19 | No Choice              | Physical (Handgrip)                    | Effort      | Map         | High > low effort demand                        |
| Massar 2015       | 23 | Choice                 | Cognitive (Backwards typing)           | Net Value   | Map         | SV of chosen option                             |
|                   |    |                        |                                        | Effort      | Map         | Parametric effort level                         |
| Nagase 2018       | 33 | Reward/effort learning | Cognitive (Arithmetic)                 | Effort      | Map         | Expected effort demand of chosen option         |
| Park 2017         | 30 | No Choice              | Physical (Mouse click)                 | Effort      | Coordinates | High vs low effort demand                       |
| Prévost 2010      | 16 | Choice                 | Physical (Handgrip)                    | Net Value   | Coordinates | SV of variable option                           |
|                   |    |                        |                                        | Effort      | Coordinates | Parametric Effort Demand                        |

|                     |    |                        |                                 |             |             |                                         |
|---------------------|----|------------------------|---------------------------------|-------------|-------------|-----------------------------------------|
| Sayali & Badre 2019 | 50 | Choice                 | Cognitive (Cued task switching) | Effort      | Map         | Expected effort demand of chosen option |
| Scholl 2015         | 20 | Reward/effort learning | Physical (Trackball)            | Net Value   | Map         | Decision value difference               |
|                     |    |                        |                                 | Effort      | Map         | Effort demand difference                |
| Seaman 2018         | 75 | Choice                 | Physical (Keyboard)             | Net Value   | Map         | SV of chosen option                     |
| Skvortsova 2014     | 20 | Reward/effort learning | Physical (Handgrip)             | Net Value   | Map         | Expected value demand of chosen option  |
|                     |    |                        |                                 | Effort      | Map         | Effort Q                                |
| Stoppel 2011        | 18 | No Choice              | Cognitive (Line tracing)        | Net Value** | Coordinates | Reward X Difficulty                     |
|                     |    |                        |                                 | Effort      | Coordinates | Hard > easy effort                      |
| Suzuki 2020         | 19 | Choice                 | Physical (Keypress)             | Net Value   | Coordinates | SV of chosen option                     |
|                     |    | No Choice              | Physical (Maze Navigation)      | Effort      | Coordinates | High > low effort                       |
| Vassena 2014        | 22 | No Choice              | Cognitive (Arithmetic)          | Effort      | Coordinates | High > low effort                       |
| Westbrook 2019      | 21 | Choice                 | Cognitive (N-back)              | Net Value   | Map         | SV of the more effortful option         |
|                     |    |                        |                                 | Effort      | Map         | Effort demand                           |

389 \*Maps from separate tasks were combined for all analyses. Abbreviation: RSVP, rapid serial visual presentation.

390 \*\*Only included in supplementary Net Value analysis.

391 Table 2. Results of ROI analyses

| ROI     | MNI coordinate | Analysis          | Hedge's <i>g</i> | <i>Z</i>      | <i>p</i>          | <i>I</i> <sup>2</sup> (in %) | Egger's <i>p</i> |
|---------|----------------|-------------------|------------------|---------------|-------------------|------------------------------|------------------|
| vmPFC   | (2, 46, -8)    | <b>Net value</b>  | <b>0.332</b>     | <b>5.861</b>  | <b>&lt; 0.001</b> | <b>0.007</b>                 | <b>0.393</b>     |
|         |                | <b>Raw effort</b> | <b>-0.167</b>    | <b>-2.482</b> | <b>0.013</b>      | <b>39.381</b>                | <b>0.678</b>     |
| rVS     | (12, 10, -6)   | <b>Net value</b>  | <b>0.167</b>     | <b>2.334</b>  | <b>0.020</b>      | <b>35.404</b>                | <b>0.420</b>     |
|         |                | Raw effort        | -0.061           | -1.170        | 0.242             | < 0.001                      | 0.286            |
| lVS     | (-12, 12, -6)  | Net value         | 0.132            | 1.779         | 0.075             | 40.289                       | 0.559            |
|         |                | Raw effort        | -0.082           | -1.565        | 0.118             | < 0.001                      | 0.879            |
| Pre-SMA | (-2, 16, 46)   | <b>Net value</b>  | <b>-0.290</b>    | <b>-2.255</b> | <b>0.024</b>      | <b>78.669</b>                | <b>0.130</b>     |
|         |                | <b>Raw effort</b> | <b>0.187</b>     | <b>2.142</b>  | <b>0.032</b>      | <b>63.161</b>                | <b>0.726</b>     |
| ACC     | (-2, 28, 28)   | Net value         | -0.088           | -0.792        | 0.429             | 72.962                       | 0.735            |
|         |                | Raw effort        | 0.083            | 1.163         | 0.245             | 47.311                       | 0.764            |
| rAI     | (32, 20, -6)   | Net value         | -0.151           | -1.474        | 0.141             | 68.130                       | 0.131            |
|         |                | Raw effort        | 0.109            | 1.751         | 0.080             | 31.031                       | 0.195            |
| lAI     | (-30, 22, -6)  | Net value         | -0.090           | -0.787        | 0.431             | 74.025                       | 0.107            |
|         |                | Raw effort        | 0.055            | 0.894         | 0.371             | 29.295                       | 0.388            |

392 Abbreviations: vm, ventromedial; r, right; l, left; PFC, prefrontal cortex; VS, ventral striatum; ACC, anterior cingulate cortex; AI, anterior insula.

393 Table 3. Results of whole-brain analyses

| Analysis           | Cluster | Voxels                       | Peak MNI coordinates | BA | Regions                      | SDM-Z      | $I^2$ (in %) | Egger's $p$ |   |             |        |        |       |
|--------------------|---------|------------------------------|----------------------|----|------------------------------|------------|--------------|-------------|---|-------------|--------|--------|-------|
| Net value          | 1*      | 23918                        | -4, 52, -8           | 10 | Left vmPFC                   | 7.052      | 0.208        | 0.702       |   |             |        |        |       |
|                    |         |                              | 2, 52, -8            | 11 | Right vmPFC                  | 6.473      |              |             |   |             |        |        |       |
|                    |         |                              | 8, 10, -8            |    | Right NAc                    | 6.417      |              |             |   |             |        |        |       |
|                    |         |                              | 30, -6, -4           |    | Right putamen                | 5.782      |              |             |   |             |        |        |       |
|                    |         |                              | -32, -16, 4          |    | Left putamen                 | 5.546      |              |             |   |             |        |        |       |
|                    |         |                              | -22, -6, -14         | 34 | Left amygdala                | 5.398      |              |             |   |             |        |        |       |
|                    |         |                              | 24, 0, -16           | 34 | Right amygdala               | 5.372      |              |             |   |             |        |        |       |
|                    |         |                              | -50, -62, 14         | 37 | Left temporal gyrus          | 5.335      |              |             |   |             |        |        |       |
|                    |         |                              | -6, 14, -8           |    | Left NAc                     | 5.255      |              |             |   |             |        |        |       |
|                    | 2*      | 3821                         | -6, 38, 0            | 11 | Left ACC                     | 5.170      | 6.332        | 0.444       |   |             |        |        |       |
|                    |         |                              | -52, -50, 2          | 21 | Left middle temporal gyrus   | 5.145      |              |             |   |             |        |        |       |
|                    |         |                              | 24, 14, -16          | 48 | Right insula                 | 5.131      |              |             |   |             |        |        |       |
|                    |         |                              | -14, -38, 40         | 23 | Left PCC                     | 5.592      |              |             |   |             |        |        |       |
|                    |         |                              | -12, -40, 44         |    | Left precuneus               | 5.446      |              |             |   |             |        |        |       |
|                    |         |                              | 0, -8, 42            | 23 | Dorsal ACC                   | 5.003      |              |             |   |             |        |        |       |
|                    |         |                              | -16, -34, 40         |    | Left superior parietal gyrus | 4.879      |              |             |   |             |        |        |       |
|                    |         |                              | -26, 28, 38          | 9  | Left dlPFC                   | 4.245      |              |             |   |             |        |        |       |
|                    |         |                              | Prospective effort   | 1* | 112                          | -8, 16, 52 |              |             | 6 | Left SMA    | -3.718 | 3.266  | 0.594 |
|                    |         |                              |                      |    |                              | 44, 38, 24 |              |             | 8 | Right dlPFC | -4.263 | 64.089 | 0.085 |
| 16, 20, 58         | 8       | Right superior frontal gyrus |                      |    |                              | -3.797     | 50.050       | 0.186       |   |             |        |        |       |
| 8, 16, 64          | 6       | Right SMA                    |                      |    |                              | 3.966      | 24.707       | 0.249       |   |             |        |        |       |
| -8, 8, 52          | 6       | Left SMA                     |                      |    |                              | 3.922      | 1.069        | 0.494       |   |             |        |        |       |
| 14, -66, 38        | 7       | Right precuneus              |                      |    |                              | 3.615      | 0.161        | 0.684       |   |             |        |        |       |
| -28, -6, 50        | 6       | Left middle frontal gyrus    |                      |    |                              | 3.505      | 59.40        | 0.111       |   |             |        |        |       |
| -8, 56, -8         | 11      | Left vmPFC                   |                      |    |                              | -4.264     | 0.162        | 0.933       |   |             |        |        |       |
| Prospective effort | 1*      | 112                          | -42, 30, -14         | 47 | Left OFC                     | -4.037     | 5.901        | 0.634       |   |             |        |        |       |
|                    |         |                              | 6, 54, -14           | 11 | Right vmPFC                  | -3.798     | 0.002        | 0.947       |   |             |        |        |       |
|                    |         |                              | -56, -6, -18         | 21 | Left middle temporal gyrus   | -4.385     | 15.71        | 0.936       |   |             |        |        |       |
|                    |         |                              |                      |    |                              |            | 7.473        | 0.724       |   |             |        |        |       |

394 All results survived a statistical threshold of voxel-level uncorrected  $p < 0.001$  and cluster size  $> 20$ .

395 \* Regions survived a statistical threshold of TFCE-corrected  $p < 0.025$ .

396 Abbreviations: BA, Brodmann areas; vm, ventromedial; dl, dorsolateral; d, dorsal; r, rostral; PFC, prefrontal cortex; NAc, nucleus accumbens; ACC, anterior  
397 cingulate cortex; PCC, posterior cingulate cortex; SMA, supplementary motor area; OFC, orbitofrontal cortex.

398 **Figure legend**

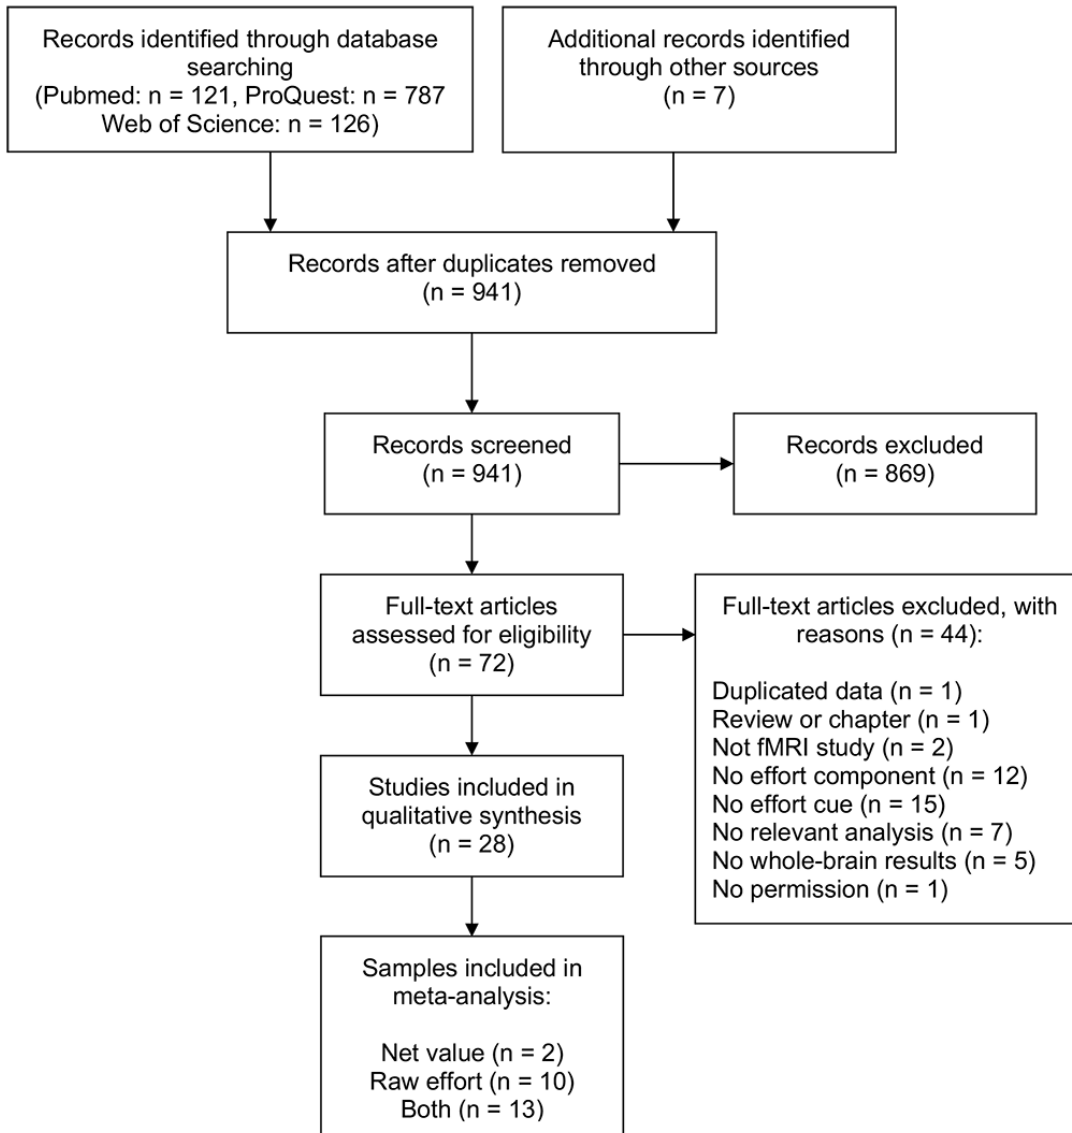

399

400 Figure 1. Preferred Reporting Items for Systematic Reviews and Meta-Analyses (PRISMA) flow diagram.

401

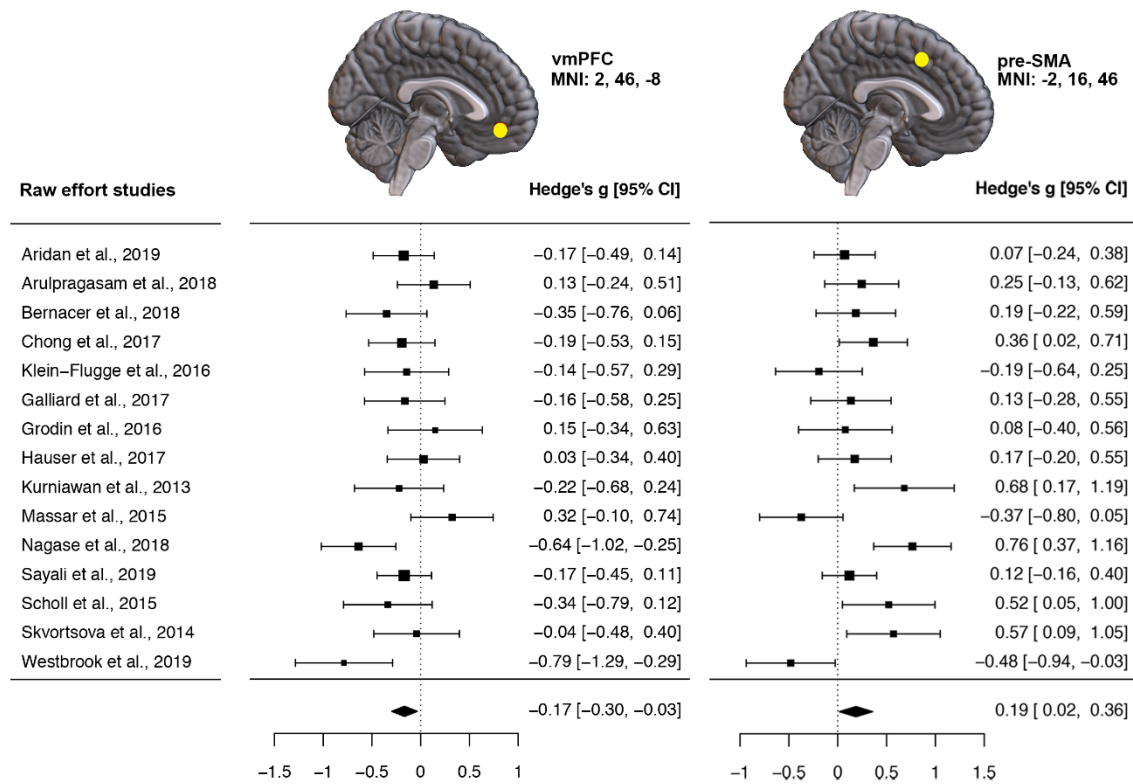

402

403 Figure 2. Forest plot illustrating activation related to effort demand in the vmPFC and pre-SMA ROIs in

404 studies with statistical maps. Contrary to our findings for net value signaling, the pre-SMA is activated

405 (Hedge's  $g = 0.20$ , 95% CI [0.02, 0.37]) and the vmPFC is deactivated (Hedge's  $g = -0.17$ , 95% CI [-0.30, -

406 0.03]) when tracking pure prospective effort.

407

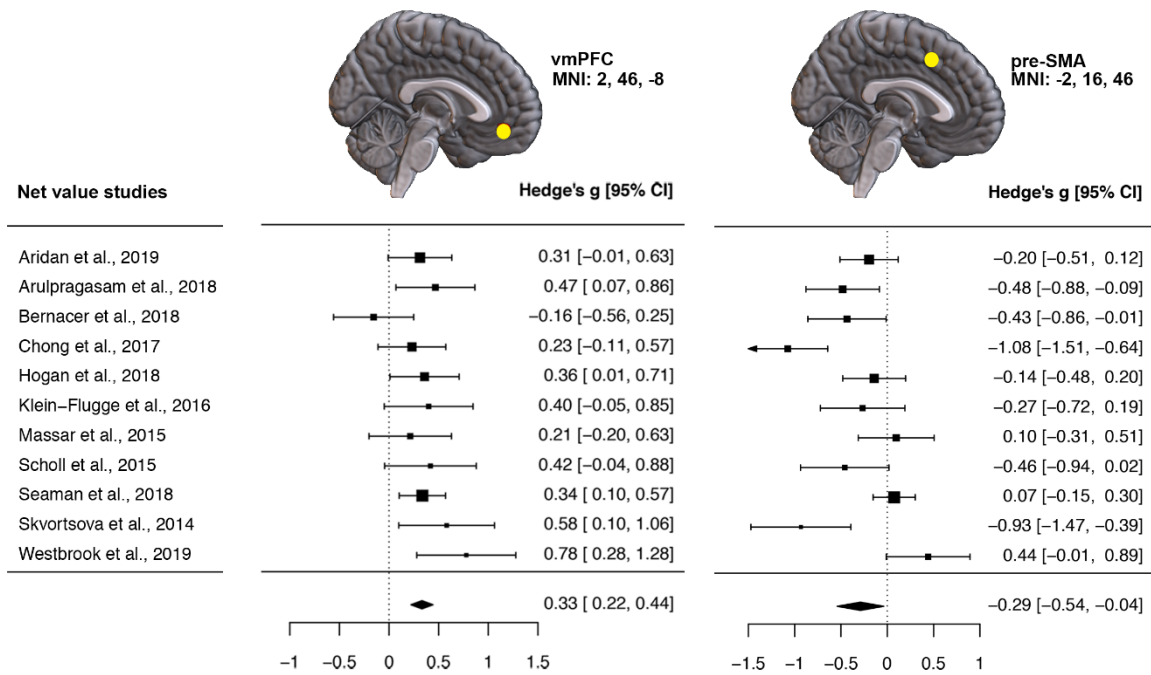

408

409 Figure 3. Forest plot illustrating activation related to net value in the vmPFC and pre-SMA ROIs in studies

410 with statistical maps. The vmPFC is activated (Hedge's  $g=0.22$ , 95% CI [0.22, 0.44]) and the pre-SMA is

411 deactivated (Hedge's  $g=-0.28$ , 95% CI [-0.52, -0.03]) during effort-reward integration.

412

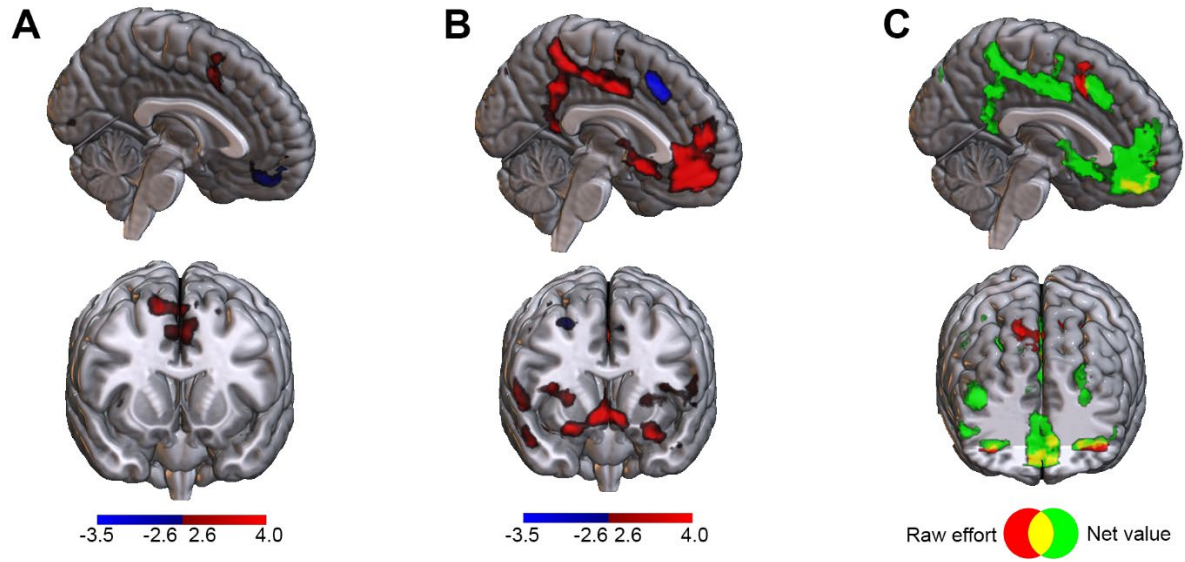

413

414 Figure 4. Whole-brain meta-analytic results. A: neural activity related to pure effort cost representation;

415 B: neural activity related to net value; and C: their conjunction based on absolute values. Display

416 threshold: uncorrected  $p < 0.005$  at voxel level.



417 **Reference**

- 418 Albajes-Eizagirre, A., Solanes, A., Vieta, E., Radua, J., 2019. Voxel-based meta-analysis via permutation of  
419 subject images (PSI): Theory and implementation for SDM. *Neuroimage* 186, 174–184.  
420 <https://doi.org/10.1016/j.neuroimage.2018.10.077>
- 421 Aridan, N., Malecek, N.J., Poldrack, R.A., Schonberg, T., 2019. Neural correlates of effort-based valuation  
422 with prospective choices. *Neuroimage* 185, 446–454.  
423 <https://doi.org/https://doi.org/10.1016/j.neuroimage.2018.10.051>
- 424 Arulpragasam, A.R., Cooper, J.A., Nuutinen, M.R., Treadway, M.T., 2018. Corticoinsular circuits encode  
425 subjective value expectation and violation for effortful goal-directed behavior. *Proc. Natl. Acad. Sci.*  
426 *U. S. A.* 115, E5233–E5242. <https://doi.org/10.1073/pnas.1800444115>
- 427 Assadi, S.M., Yücel, M., Pantelis, C., 2009. Dopamine modulates neural networks involved in effort-based  
428 decision-making. *Neurosci. Biobehav. Rev.* 33, 383–393.  
429 <https://doi.org/10.1016/j.neubiorev.2008.10.010>
- 430 Bailey, M.R., Simpson, E.H., Balsam, P.D., 2016. Neural substrates underlying effort, time, and risk-based  
431 decision making in motivated behavior. *Neurobiol. Learn. Mem.* 133, 233–256.  
432 <https://doi.org/10.1016/J.NLM.2016.07.015>
- 433 Barch, D.M., Treadway, M.T., Schoen, N., 2014. Effort, anhedonia, and function in schizophrenia:  
434 Reduced effort allocation predicts amotivation and functional impairment. *J. Abnorm. Psychol.*  
435 123, 387–397. <https://doi.org/10.1037/a0036299>
- 436 Bartra, O., McGuire, J.T., Kable, J.W., 2013. The valuation system: A coordinate-based meta-analysis of  
437 BOLD fMRI experiments examining neural correlates of subjective value. *Neuroimage* 76, 412–427.  
438 <https://doi.org/https://doi.org/10.1016/j.neuroimage.2013.02.063>
- 439 Bernacer, J., Martinez-Valbuena, I., Martinez, M., Pujol, N., Luis, E., Ramirez-Castillo, D., Pastor, M.A.,  
440 2019. Neural correlates of effort-based behavioral inconsistency. *Cortex* 113, 96–110.  
441 <https://doi.org/https://doi.org/10.1016/j.cortex.2018.12.005>
- 442 Bonnelle, V., Manohar, S., Behrens, T., Husain, M., 2016. Individual Differences in Premotor Brain  
443 Systems Underlie Behavioral Apathy. *Cereb. Cortex* 26, 807–819.  
444 <https://doi.org/10.1093/cercor/bhv247>

- 445 Botvinick, M., Braver, T., 2015. Motivation and cognitive control: From behavior to neural mechanism.  
446 *Annu. Rev. Psychol.* 66, 83–113. <https://doi.org/10.1146/annurev-psych-010814-015044>
- 447 Botvinick, M.M., Carter, C.S., Braver, T.S., Barch, D.M., Cohen, J.D., 2001. Conflict monitoring and  
448 cognitive control. *Psychol. Rev.* 108, 624–652. <https://doi.org/10.1037/0033-295X.108.3.624>
- 449 Burke, C.J., Brunger, C., Kahnt, T., Park, S.Q., Tobler, P.N., 2013. Neural Integration of Risk and Effort  
450 Costs by the Frontal Pole: Only upon Request. *J. Neurosci.* 33, 1706–1713.  
451 <https://doi.org/10.1523/JNEUROSCI.3662-12.2013>
- 452 Camille, N., Tsuchida, A., Fellows, L.K., 2011. Double dissociation of stimulus-value and action-value  
453 learning in humans with orbitofrontal or anterior cingulate cortex damage. *J. Neurosci.* 31, 15048–  
454 15052. <https://doi.org/10.1523/JNEUROSCI.3164-11.2011>
- 455 Chen, X., Voets, S., Jenkinson, N., Galea, J.M., 2020. Dopamine-Dependent Loss Aversion during Effort-  
456 Based Decision-Making. *J. Neurosci.* 40, 661–670. [https://doi.org/10.1523/JNEUROSCI.1760-](https://doi.org/10.1523/JNEUROSCI.1760-19.2019)  
457 [19.2019](https://doi.org/10.1523/JNEUROSCI.1760-19.2019)
- 458 Chong, T.T.-J., Apps, M., Giehl, K., Sillence, A., Grima, L.L., Husain, M., 2017. Neurocomputational  
459 mechanisms underlying subjective valuation of effort costs. *PLOS Biol.* 15, e1002598.  
460 <https://doi.org/10.1371/journal.pbio.1002598>
- 461 Chong, T.T.J., Husain, M., 2016. The role of dopamine in the pathophysiology and treatment of apathy,  
462 in: *Progress in Brain Research*. Elsevier B.V., pp. 389–426.  
463 <https://doi.org/10.1016/bs.pbr.2016.05.007>
- 464 Clithero, J.A., Rangel, A., 2013. Informatic parcellation of the network involved in the computation of  
465 subjective value. *Soc. Cogn. Affect. Neurosci.* 9, 1289–1302. <https://doi.org/10.1093/scan/nst106>
- 466 Cowen, S.L., Davis, G.A., Nitz, D.A., 2012. Anterior cingulate neurons in the rat map anticipated effort  
467 and reward to their associated action sequences. *J. Neurophysiol.* 107, 2393–2407.  
468 <https://doi.org/10.1152/jn.01012.2011>
- 469 Croxson, P.L., Walton, M.E., O'Reilly, J.X., Behrens, T.E.J., Rushworth, M.F.S., 2009. Effort-based cost-  
470 benefit valuation and the human brain. *J. Neurosci.* 29, 4531–41.  
471 <https://doi.org/10.1523/JNEUROSCI.4515-08.2009>
- 472 Day, J.J., Jones, J.L., Wightman, R.M., Carelli, R.M., 2010. Phasic nucleus accumbens dopamine release

- 473 encodes effort- and delay-related costs. *Biol. Psychiatry* 68, 306–309.  
474 <https://doi.org/10.1016/j.biopsych.2010.03.026>
- 475 den Brok, M.G.H.E., van Dalen, J.W., van Gool, W.A., Moll van Charante, E.P., de Bie, R.M.A., Richard, E.,  
476 2015. Apathy in Parkinson's disease: A systematic review and meta-analysis. *Mov. Disord.* 30, 759–  
477 769. <https://doi.org/10.1002/mds.26208>
- 478 Diekhof, E.K., Kaps, L., Falkai, P., Gruber, O., 2012. The role of the human ventral striatum and the  
479 medial orbitofrontal cortex in the representation of reward magnitude - An activation likelihood  
480 estimation meta-analysis of neuroimaging studies of passive reward expectancy and outcome  
481 processing. *Neuropsychologia* 50, 1252–1266.  
482 <https://doi.org/10.1016/j.neuropsychologia.2012.02.007>
- 483 Egger, M., Smith, G.D., Schneider, M., Minder, C., 1997. Bias in meta-analysis detected by a simple,  
484 graphical test. *Br. Med. J.* 315, 629–634. <https://doi.org/10.1136/bmj.315.7109.629>
- 485 Gaillard, C., Guillod, M., Ernst, M., Torrisi, S., Federspiel, A., Schoebi, D., Recabarren, R.E., Ouyang, X.,  
486 Mueller-Pfeiffer, C., Horsch, A., Homan, P., Wiest, R., Hasler, G., Martin-Soelch, C., 2019. Striatal  
487 responsiveness to reward under threat-of-shock and working memory load: A preliminary study.  
488 *Brain Behav.* 9. <https://doi.org/http://dx.doi.org/10.1002/brb3.1397>
- 489 Grodin, E.N., Steckler, L.E., Momenan, R., 2016. Altered Striatal Response During Effort-Based Valuation  
490 and Motivation in Alcohol-Dependent Individuals. *Alcohol Alcohol. Suppl.* 51, 638–646.  
491 <https://doi.org/10.1093/alcalc/agw003>
- 492 Guitart-Masip, M., Chowdhury, R., Sharot, T., Dayan, P., Duzel, E., Dolan, R.J., 2012. Action controls  
493 dopaminergic enhancement of reward representations. *Proc. Natl. Acad. Sci. U. S. A.* 109.
- 494 Hartmann, M.N., Hager, O.M., Reimann, A. V, Chumbley, J.R., Kirschner, M., Seifritz, E., Tobler, P.N.,  
495 Kaiser, S., 2015. Apathy But Not Diminished Expression in Schizophrenia Is Associated With  
496 Discounting of Monetary Rewards by Physical Effort. *Schizophr. Bull.* 41, 503–512.
- 497 Hauser, T.U., Eldar, E., Dolan, R.J., 2017. Separate mesocortical and mesolimbic pathways encode effort  
498 and reward learning signals. *Proc. Natl. Acad. Sci.* 114, E7395–E7404.  
499 <https://doi.org/10.1073/pnas.1705643114>
- 500 Hillman, K.L., Bilkey, D.K., 2012. Neural encoding of competitive effort in the anterior cingulate cortex.

- 501 Nat. Neurosci. 15, 1290–1297. <https://doi.org/10.1038/nn.3187>
- 502 Hillman, K.L., Bilkey, D.K., 2010. Neurons in the rat anterior cingulate cortex dynamically encode cost-  
503 benefit in a spatial decision-making task. *J. Neurosci.* 30, 7705–7713.  
504 <https://doi.org/10.1523/JNEUROSCI.1273-10.2010>
- 505 Hogan, P.S., Galaro, J.K., Chib, V.S., 2019. Roles of Ventromedial Prefrontal Cortex and Anterior  
506 Cingulate in Subjective Valuation of Prospective Effort. *Cereb. Cortex* 29, 4277–4290.  
507 <https://doi.org/10.1093/cercor/bhy310>
- 508 Hogan, P.S., Galaro, J.K., Chib, V.S., 2017. Dissociable Roles of Ventromedial Prefrontal Cortex and  
509 Anterior Cingulate in Subjective Valuation of Prospective Effort. *BioRxiv*.  
510 <https://doi.org/http://dx.doi.org/10.1101/079467>
- 511 Husain, M., 2019. Visual Attention: What Inattention Reveals about the Brain. *Curr. Biol.* 29, R262–R264.  
512 <https://doi.org/https://doi.org/10.1016/j.cub.2019.02.026>
- 513 Husain, M., Roiser, J.P., 2018. Neuroscience of apathy and anhedonia: a transdiagnostic approach. *Nat.*  
514 *Rev. Neurosci.* 19, 470–484. <https://doi.org/10.1038/s41583-018-0029-9>
- 515 Kable, J.W., Glimcher, P.W., 2007. The neural correlates of subjective value during intertemporal choice.  
516 *Nat. Neurosci.* 10, 1625–1633. <https://doi.org/10.1038/nn2007>
- 517 Kahneman, D., Tversky, A., 1979. Prospect Theory: An Analysis of Decision under Risk. *Econometrica* 47,  
518 263–291. <https://doi.org/10.2307/1914185>
- 519 Keuken, M.C., Müller-Axt, C., Langner, R., Eickhoff, S.B., Forstmann, B.U., Neumann, J., 2014. Brain  
520 networks of perceptual decision-making: an fMRI ALE meta-analysis. *Front. Hum. Neurosci.* 8, 445.  
521 <https://doi.org/10.3389/fnhum.2014.00445>
- 522 Klein-Flugge, M.C., Kennerley, S.W., Friston, K., Bestmann, S., 2016. Neural Signatures of Value  
523 Comparison in Human Cingulate Cortex during Decisions Requiring an Effort-Reward Trade-off. *J.*  
524 *Neurosci.* 36, 10002–10015. <https://doi.org/10.1523/JNEUROSCI.0292-16.2016>
- 525 Knutson, B., Greer, S.M., 2008. Review. Anticipatory affect: Neural correlates and consequences for  
526 choice. *Philos. Trans. R. Soc. B Biol. Sci.* <https://doi.org/10.1098/rstb.2008.0155>
- 527 Knutson, B., Westdorp, A., Kaiser, E., Hommer, D., 2000. FMRI visualization of brain activity during a  
528 monetary incentive delay task. *Neuroimage* 12, 20–27. <https://doi.org/10.1006/nimg.2000.0593>

- 529 Kool, W., McGuire, J.T., Rosen, Z.B., Botvinick, M.M., 2010. Decision making and the avoidance of  
530 cognitive demand. *J. Exp. Psychol. Gen.* 139, 665–82. <https://doi.org/10.1037/a0020198>
- 531 Kouneiher, F., Charron, S., Koechlin, E., 2009. Motivation and cognitive control in the human prefrontal  
532 cortex. *Nat. Neurosci.* 12, 939–945. <https://doi.org/10.1038/nn.2321>
- 533 Kurniawan, I.T., Guitart-Masip, M., Dayan, P., Dolan, R.J., 2013. Effort and Valuation in the Brain: The  
534 Effects of Anticipation and Execution. *J. Neurosci.* 33, 6160.
- 535 Kurniawan, I.T., Guitart-Masip, M., Dolan, R.J., 2011. Dopamine and effort-based decision making. *Front.*  
536 *Neurosci.* 5, 81. <https://doi.org/10.3389/fnins.2011.00081>
- 537 Kurniawan, I.T., Seymour, B., Talmi, D., Yoshida, W., Chater, N., Dolan, R.J., 2010. Choosing to Make an  
538 Effort: The Role of Striatum in Signaling Physical Effort of a Chosen Action. *J. Neurophysiol.* 104,  
539 313–321. <https://doi.org/10.1152/jn.00027.2010>
- 540 Le Heron, C., Plant, O., Manohar, S., Ang, Y.-S., Jackson, M., Lennox, G., Hu, M.T., Husain, M., 2018.  
541 Distinct effects of apathy and dopamine on effort-based decision-making in Parkinson’s disease.  
542 *Brain* 141, 1455–1469. <https://doi.org/10.1093/brain/awy110>
- 543 Levy, D.J., Glimcher, P.W., 2012. The root of all value: a neural common currency for choice. *Curr. Opin.*  
544 *Neurobiol.* 22, 1027–1038. <https://doi.org/10.1016/j.conb.2012.06.001>
- 545 Levy, I., Snell, J., Nelson, A.J., Rustichini, A., Glimcher, P.W., 2010. Neural representation of subjective  
546 value under risk and ambiguity. *J. Neurophysiol.* 103, 1036–1047.  
547 <https://doi.org/10.1152/jn.00853.2009>
- 548 Luijten, M., Schellekens, A.F., Kühn, S., Machielse, M.W.J., Sescousse, G., 2017. Disruption of Reward  
549 Processing in Addiction : An Image-Based Meta-analysis of Functional Magnetic Resonance  
550 Imaging Studies. *JAMA psychiatry* 74, 387–398. <https://doi.org/10.1001/jamapsychiatry.2016.3084>
- 551 Massar, S.A.A., Libedinsky, C., Weiyan, C., Huettel, S.A., Chee, M.W.L., 2015. Separate and overlapping  
552 brain areas encode subjective value during delay and effort discounting. *Neuroimage* 120, 104–  
553 113. <https://doi.org/https://doi.org/10.1016/j.neuroimage.2015.06.080>
- 554 Mehta, P.S., Tu, J.C., LoConte, G.A., Pesce, M.C., Hayden, B.Y., 2019. Ventromedial prefrontal cortex  
555 tracks multiple environmental variables during search. *J. Neurosci.* 39, 5336–5350.  
556 <https://doi.org/10.1523/JNEUROSCI.2365-18.2019>

- 557 Mohr, P.N.C., Biele, G., Heekeren, H.R., 2010. Neural processing of risk. *J. Neurosci.* 30, 6613–6619.  
558 <https://doi.org/10.1523/JNEUROSCI.0003-10.2010>
- 559 Mulert, C., Menzinger, E., Leicht, G., Pogarell, O., Hegerl, U., 2005. Evidence for a close relationship  
560 between conscious effort and anterior cingulate cortex activity. *Int. J. Psychophysiol.* 56, 65–80.  
561 <https://doi.org/10.1016/j.ijpsycho.2004.10.002>
- 562 Müller, V.I., Cieslik, E.C., Laird, A.R., Fox, P.T., Radua, J., Mataix-Cols, D., Tench, C.R., Yarkoni, T., Nichols,  
563 T.E., Turkeltaub, P.E., Wager, T.D., Eickhoff, S.B., 2018. Ten simple rules for neuroimaging meta-  
564 analysis. *Neurosci. Biobehav. Rev.* 84, 151–161. <https://doi.org/10.1016/j.neubiorev.2017.11.012>
- 565 Nagase, A.M., Onoda, K., Foo, J.C., Haji, T., Akaishi, R., Yamaguchi, S., Sakai, K., Morita, K., 2018. Neural  
566 mechanisms for adaptive learned avoidance of mental effort. *J. Neurosci.* 38, 2631–2651.  
567 <https://doi.org/10.1523/JNEUROSCI.1995-17.2018>
- 568 Neubert, F.X., Mars, R.B., Sallet, J., Rushworth, M.F.S., 2015. Connectivity reveals relationship of brain  
569 areas for reward-guided learning and decision making in human and monkey frontal cortex. *Proc.*  
570 *Natl. Acad. Sci. U. S. A.* 112, E2695–E2704. <https://doi.org/10.1073/pnas.1410767112>
- 571 Otto, A., Daw, N., 2019. The opportunity cost of time modulates cognitive effort. *Neuropsychologia* 123.  
572 <https://doi.org/10.1016/j.neuropsychologia.2018.05.006>
- 573 Padoa-Schioppa, C., 2011. Neurobiology of Economic Choice: A Good-Based Model.  
574 <https://doi.org/10.1146/annurev-neuro-061010-113648>
- 575 Park, I.H., Lee, B.C., Kim, J.J., Kim, J. II, Koo, M.S., 2017. Effort-Based Reinforcement Processing and  
576 Functional Connectivity Underlying Amotivation in Medicated Patients with Depression and  
577 Schizophrenia. *J. Neurosci.* 37, 4370–4380. <https://doi.org/10.1523/JNEUROSCI.2524-16.2017>
- 578 Peters, J., Büchel, C., 2009. Overlapping and distinct neural systems code for subjective value during  
579 intertemporal and risky decision making. *J. Neurosci.* 29, 15727–15734.  
580 <https://doi.org/10.1523/JNEUROSCI.3489-09.2009>
- 581 Poldrack, R.A., Baker, C.I., Durnez, J., Gorgolewski, K.J., Matthews, P.M., Munafò, M.R., Nichols, T.E.,  
582 Poline, J.B., Vul, E., Yarkoni, T., 2017. Scanning the horizon: Towards transparent and reproducible  
583 neuroimaging research. *Nat. Rev. Neurosci.* 18, 115–126. <https://doi.org/10.1038/nrn.2016.167>
- 584 Pooresmaeili, A., Wannig, A., Dolan, R.J., 2015. Receipt of reward leads to altered estimation of effort.

- 585 Proc. Natl. Acad. Sci. U. S. A. 112, 13407–13410. <https://doi.org/10.1073/pnas.1507527112>
- 586 Porat, O., Hassin-Baer, S., Cohen, O.S., Markus, A., Tomer, R., 2014. Asymmetric dopamine loss  
587 differentially affects effort to maximize gain or minimize loss. *Cortex* 51, 82–91.  
588 <https://doi.org/10.1016/j.cortex.2013.10.004>
- 589 Prévost, C., Pessiglione, M., Météreau, E., Cléry-Melin, M.-L., Dreher, J.-C., 2010. Separate valuation  
590 subsystems for delay and effort decision costs. *J. Neurosci.* 30, 14080–90.  
591 <https://doi.org/10.1523/JNEUROSCI.2752-10.2010>
- 592 Radua, J., del Pozo, N., Gomez, J., Guillen-Grima, F., Ortuno, F., 2014. Meta-analysis of functional  
593 neuroimaging studies indicates that an increase of cognitive difficulty during executive tasks  
594 engages brain regions associated with time perception. *Neuropsychologia* 58, 14–22.  
595 <https://doi.org/10.1016/j.neuropsychologia.2014.03.016>
- 596 Radua, J., Mataix-Cols, D., Phillips, M.L., El-Hage, W., Kronhaus, D.M., Cardoner, N., Surguladze, S., 2012.  
597 A new meta-analytic method for neuroimaging studies that combines reported peak coordinates  
598 and statistical parametric maps. *Eur. Psychiatry* 27, 605–611.  
599 <https://doi.org/10.1016/j.eurpsy.2011.04.001>
- 600 Rangel, A., Camerer, C., Montague, P.R., 2008. A framework for studying the neurobiology of value-  
601 based decision making. *Nat. Rev. Neurosci.* <https://doi.org/10.1038/nrn2357>
- 602 Rudebeck, P.H., Walton, M.E., Smyth, A.N., Bannerman, D.M., Rushworth, M.F.S., 2006. Separate neural  
603 pathways process different decision costs. *Nat. Neurosci.* 9, 1161–1168.  
604 <https://doi.org/10.1038/nn1756>
- 605 Salamone, J.D., Correa, M., Farrar, A.M., Nunes, E.J., Pardo, M., 2009. Dopamine, behavioral economics,  
606 and effort. *Front. Behav. Neurosci.* <https://doi.org/http://dx.doi.org/10.3389/neuro.08.013.2009>
- 607 Salimi-Khorshidi, G., Smith, S.M., Keltner, J.R., Wager, T.D., Nichols, T.E., 2009. Meta-analysis of  
608 neuroimaging data: a comparison of image-based and coordinate-based pooling of studies.  
609 *Neuroimage* 45, 810–823. <https://doi.org/10.1016/j.neuroimage.2008.12.039>
- 610 Sayali, C., Badre, D., 2019. Neural systems of cognitive demand avoidance. *Neuropsychologia* 123, 41–  
611 54. <https://doi.org/10.1016/j.neuropsychologia.2018.06.016>
- 612 Schmidt, L., Lebreton, M., Cléry-Melin, M.-L., Daunizeau, J., Pessiglione, M., 2012. Neural Mechanisms



- 613 Underlying Motivation of Mental Versus Physical Effort. *PLOS Biol.* 10, e1001266-.
- 614 Scholl, J., Kolling, N., Nelissen, N., Wittmann, M.K., Harmer, C.J., Rushworth, M.F.S., 2015. The good, the  
615 bad, and the irrelevant: Neural mechanisms of learning real and hypothetical rewards and effort. *J.*  
616 *Neurosci.* 35, 11233–11251. <https://doi.org/10.1523/JNEUROSCI.0396-15.2015>
- 617 Schüller, C.B., Kuhn, J., Jessen, F., Hu, X., 2019. Neuronal correlates of delay discounting in healthy  
618 subjects and its implication for addiction: an ALE meta-analysis study. *Am. J. Drug Alcohol Abuse.*  
619 <https://doi.org/10.1080/00952990.2018.1557675>
- 620 Seaman, K.L., Brooks, N., Karrer, T.M., Castellon, J.J., Perkins, S.F., Dang, L.C., Hsu, M., Zald, D.H.,  
621 Samanez-Larkin, G.R., 2018. Subjective value representations during effort, probability and time  
622 discounting across adulthood. *Soc. Cogn. Affect. Neurosci.* 13, 449–459.  
623 <https://doi.org/10.1093/scan/nsy021>
- 624 Sescousse, G., Caldú, X., Segura, B., Dreher, J.C., 2013. Processing of primary and secondary rewards: A  
625 quantitative meta-analysis and review of human functional neuroimaging studies. *Neurosci.*  
626 *Biobehav. Rev.* <https://doi.org/10.1016/j.neubiorev.2013.02.002>
- 627 Shenhav, A., Botvinick, M.M., Cohen, J.D., 2013. The Expected Value of Control: An Integrative Theory of  
628 Anterior Cingulate Cortex Function. *Neuron* 79, 217–240.  
629 <https://doi.org/10.1016/j.neuron.2013.07.007>
- 630 Skvortsova, V., Palminteri, S., Pessiglione, M., 2014. Learning to minimize efforts versus maximizing  
631 rewards: Computational principles and neural correlates. *J. Neurosci.* 34, 15621–15630.  
632 <https://doi.org/10.1523/JNEUROSCI.1350-14.2014>
- 633 Soder, H.E., Cooper, J.A., Lopez-Gamundi, P., Hoots, J.K., Nunez, C., Lawlor, V.M., Lane, S.D., Treadway,  
634 M.T., Wardle, M.C., 2020. Dose-response effects of d-amphetamine on effort-based decision-  
635 making and reinforcement learning. *Neuropsychopharmacology.* [https://doi.org/10.1038/s41386-](https://doi.org/10.1038/s41386-020-0779-8)  
636 [020-0779-8](https://doi.org/10.1038/s41386-020-0779-8)
- 637 Stoppel, C.M., Boehler, C.N., Strumpf, H., Heinze, H.J., Hopf, J.M., Schoenfeld, M.A., 2011. Neural  
638 processing of reward magnitude under varying attentional demands. *Brain Res.* 1383, 218–229.  
639 <https://doi.org/10.1016/j.brainres.2011.01.095>
- 640 Sutton, R.S., Barto, A.G., 1998. Reinforcement learning : an introduction. MIT Press, Cambridge, Mass. :



- 641 Suzuki, S., Lawlor, V.M., Cooper, J.A., Arulpragasam, A.R., Treadway, M.T., 2020. Distinct striatal  
642 subregions and corticostriatal connectivity for effort, action and reward. *bioRxiv*  
643 2020.02.12.925313. <https://doi.org/10.1101/2020.02.12.925313>
- 644 Syed, E.C.J., Grima, L.L., Magill, P.J., Bogacz, R., Brown, P., Walton, M.E., 2016. Action initiation shapes  
645 mesolimbic dopamine encoding of future rewards. *Nat. Neurosci.* 19, 34–36.  
646 <https://doi.org/10.1038/nn.4187>
- 647 Tanaka, S.C., Yamada, K., Yoneda, H., Ohtake, F., 2014. Neural mechanisms of gain-loss asymmetry in  
648 temporal discounting. *J. Neurosci.* 34, 5595–5602. [https://doi.org/10.1523/JNEUROSCI.5169-](https://doi.org/10.1523/JNEUROSCI.5169-12.2014)  
649 12.2014
- 650 Treadway, M.T., Memmer, M., Shelton, R.C., Zald, D.H., 2012. Neural Mechanisms of Effort-Based  
651 Decision-Making in Depressed Patients. *Biol. Psychiatry* 71, 311S.
- 652 Vassena, E., Deraeve, J., Alexander, W.H., 2020. Surprise, value and control in anterior cingulate cortex  
653 during speeded decision-making. *Nat. Hum. Behav.* 4, 412–422. [https://doi.org/10.1038/s41562-](https://doi.org/10.1038/s41562-019-0801-5)  
654 019-0801-5
- 655 Vassena, E., Deraeve, J., Alexander, W.H., 2017. Predicting Motivation: Computational Models of PFC  
656 Can Explain Neural Coding of Motivation and Effort-based Decision-making in Health and Disease.  
657 *J. Cogn. Neurosci.* 29, 1633–1645. [https://doi.org/10.1162/jocn\\_a\\_01160](https://doi.org/10.1162/jocn_a_01160)
- 658 Vassena, E., Krebs, R.M., Silvetti, M., Fias, W., Verguts, T., 2014. Dissociating contributions of ACC and  
659 vmPFC in reward prediction, outcome, and choice. *Neuropsychologia* 59, 112–123.  
660 <https://doi.org/10.1016/j.neuropsychologia.2014.04.019>
- 661 Von Neumann, J., Morgenstern, O., 1990. *Theory of games and economic behavior*. Princeton University  
662 Press, New York :
- 663 Walton, M.E., Bannerman, D.M., Alterescu, K., Rushworth, M.F.S., 2003. Functional specialization within  
664 medial frontal cortex of the anterior cingulate for evaluating effort-related decisions. *J. Neurosci.*  
665 23, 6475–6479. <https://doi.org/10.1523/jneurosci.23-16-06475.2003>
- 666 Walton, M.E., Groves, J., Jennings, K.A., Croxson, P.L., Sharp, T., Rushworth, M.F.S., Bannerman, D.M.,  
667 2009. Comparing the role of the anterior cingulate cortex and 6-hydroxydopamine nucleus  
668 accumbens lesions on operant effort-based decision making. *Eur. J. Neurosci.* 29, 1678–1691.

- 669 <https://doi.org/10.1111/j.1460-9568.2009.06726.x>
- 670 Westbrook, A., Braver, T.S., 2015. Cognitive effort: A neuroeconomic approach. *Cogn. Affect. Behav.*  
671 *Neurosci.* <https://doi.org/10.3758/s13415-015-0334-y>
- 672 Westbrook, A., Lamichhane, B., Braver, T., 2019. The Subjective Value of Cognitive Effort is Encoded by a  
673 Domain-General Valuation Network. *J. Neurosci.* 39, 3934–3947.  
674 <https://doi.org/10.1523/JNEUROSCI.3071-18.2019>
- 675 Wilson, R.P., Colizzi, M., Bossong, M.G., Allen, P., Kempton, M., Bhattacharyya, S., 2018. The Neural  
676 Substrate of Reward Anticipation in Health: A Meta-Analysis of fMRI Findings in the Monetary  
677 Incentive Delay Task. *Neuropsychol. Rev.* 28, 496–506. <https://doi.org/10.1007/s11065-018-9385-5>
- 678 Yang, X. hua, Huang, J., Lan, Y., Zhu, C. ying, Liu, X. qun, Wang, Y. fei, Cheung, E.F.C., Xie, G. rong, Chan,  
679 R.C.K., 2016. Diminished caudate and superior temporal gyrus responses to effort-based decision  
680 making in patients with first-episode major depressive disorder. *Prog. Neuro-Psychopharmacology*  
681 *Biol. Psychiatry* 64, 52–59. <https://doi.org/10.1016/j.pnpbp.2015.07.006>
- 682 Yang, X. hua, Huang, J., Zhu, C. ying, Wang, Y. fei, Cheung, E.F.C., Chan, R.C.K., Xie, G. rong, 2014.  
683 Motivational deficits in effort-based decision making in individuals with subsyndromal depression,  
684 first-episode and remitted depression patients. *Psychiatry Res.* 220, 874–882.  
685 <https://doi.org/10.1016/j.psychres.2014.08.056>
- 686 Yi, W., Mei, S., Zhang, M., Zheng, Y., 2020. Decomposing the effort paradox in reward processing: Time  
687 matters. *Neuropsychologia* 137, 107311.  
688 <https://doi.org/https://doi.org/10.1016/j.neuropsychologia.2019.107311>
- 689 Yu, C., Zhou, Y., Liu, Y., Jiang, T., Dong, H., Zhang, Y., Walter, M., 2011. Functional segregation of the  
690 human cingulate cortex is confirmed by functional connectivity based neuroanatomical  
691 parcellation. *Neuroimage* 54, 2571–2581. <https://doi.org/10.1016/j.neuroimage.2010.11.018>
- 692 Zénon, A., Sidibé, M., Olivier, E., 2015. Disrupting the supplementary motor area makes physical effort  
693 appear less effortful. *J. Neurosci.* 35, 8737–8744. [https://doi.org/10.1523/JNEUROSCI.3789-](https://doi.org/10.1523/JNEUROSCI.3789-14.2015)  
694 [14.2015](https://doi.org/10.1523/JNEUROSCI.3789-14.2015)
- 695
